# Supplementary material for: Cost Conversations About Anticoagulation Between Patients With Atrial Fibrillation and Their Clinicians: A Secondary Analysis of a Randomized Clinical Trial
Source: PubMed Central journal article supplement (PMC8278261; doi:10.1001/jamanetworkopen.2021.16009), 2021-07-13
Supplement: jamanetwopen-e2116009-s001.pdf [file jamanetwopen-e2116009-s001.pdf]

1  
2  
3 Shared decision making for stroke prevention in atrial fibrillation (SDM4Afib)  
4

5 Investigators:

6 Peter Noseworthy, MD, Principal Investigator, Mayo Clinic

7 200 First Street SW, Rochester, MN 55905

8 (507) 293-0175

9 Noseworthy.peter@mayo.edu  
10

11 Victor Montori, MD, Co-Investigator, Mayo Clinic (Rochester, MN)

12 Bruce Burnett, MD, Co-Investigator, Park Nicollet (St. Louis Park, MN)

13 Mark Linzer, MD, Co-Investigator, Hennepin Medical Center (Minneapolis, MN)

14 Elizabeth A. Jackson, MD, Co-Investigator, UAB Medicine - The University of Alabama at  
15 Birmingham (Birmingham, AL)

16 Erik P. Hess MD, Co-Investigator, UAB Medicine - The University of Alabama at Birmingham  
17 (Birmingham, AL)

18 James Hamilton, MD, Co-Investigator, University of Mississippi Medical Center (Jackson, MS)  
19  
20  
21  
22  
23  
24

25 Date of version: October 30, 2018

26 Version number: 1.8  
27

28 Funding Source: National Heart, Lung, And Blood Institute of the  
29 National Institutes of Health under Award Number R01HL131535  
30

31

32 **Table of Contents**

33 1.0 Aims ..... 3  
34 2.0 Background and Significance ..... 3  
35 3.0 Preliminary Work..... 5  
36 4.0 Research Design & Methods ..... 6  
37 4.1 Schema..... 6  
38 4.2 Study Setting and Participation..... 6  
39 4.2.1 Eligibility Criteria for Clinicians ..... 7  
40 4.2.1.1 Enrollment of Clinicians ..... 7  
41 4.2.2 Eligibility Criteria for Patients..... 8  
42 4.2.3 Identification of Subjects ..... 9  
43 4.3 Registration and Randomization of Patients..... 10  
44 4.4 Intervention ..... 11  
45 4.4.1 Training of Clinicians ..... **Error! Bookmark not defined.**  
46 4.5 Standard Care..... 12  
47 4.6 Data Collection ..... 12  
48 4.7 Outcome Measures..... 15  
49 4.7.1 SDM quality..... 15  
50 4.7.2 SDM processes..... 17  
51 4.7.3 Anticoagulation Use..... 18  
52 4.7.4 Safety outcomes..... 19  
53 4.8 Follow-up Guidelines..... 19  
54 4.9 Statistical Analysis..... 20  
55 4.9.1 Analysis Plan ..... 20  
56 4.9.1.1 Missing Data ..... 22  
57 4.9.2 Sample Size Estimation..... 22  
58 4.9.3 Site Allocation ..... 23  
59 5.0 Conflict of Interest ..... 24  
60 6.0 Human Subjects ..... 24  
61 6.1 Data safety monitoring board..... 24  
62 6.2 Population ..... 25  
63 6.3 Potential Risks ..... 25  
64 6.4 Protection and Confidentiality ..... 25  
65 6.4.1 Subject privacy..... 25  
66 6.4.2 Data management..... 26  
67 6.4.3 Video and audio-recordings..... 26  
68 6.4.4 Registry ..... 26  
69 6.4.5 IRB Umbrella..... 27  
70 7.0 References..... 27

71

72

73

74 **1.0 Aims**

75

76 The goal of this study is to determine the extent to which standard care plus the  
77 Anticoagulation Choice tool promotes shared decision making (SDM) and impacts  
78 anticoagulation uptake and adherence versus standard care without this tool in patients with  
79 nonvalvular atrial fibrillation (AF).

80

81 **Aim 1. To what extent does use of the ANTICOAGULATION CHOICE tool promote**  
82 **high-quality SDM versus standard care?**

83

84 Using encounter video recordings and post-visit patient and clinician questionnaires, we  
85 will assess **SDM quality** (primary endpoint) **and processes**.

86

87 We hypothesize that use of the tool will improve SDM irrespective of patient  
88 literacy/numeracy, stroke risk, anticoagulation use at baseline, or type of clinic.

89

90 **Aim 2. To describe the impact Anticoagulation Choice tool has on the rate of**  
91 **anticoagulation, the choice of anticoagulant, and adherence to anticoagulation in at-risk**  
92 **patients with AF versus the impact of standard care.**

93

94 Using medical records and pharmacy profiles, we will determine the choice of  
95 anticoagulation, changes in anticoagulant use over time, and 12-month drug persistence,  
96 in all patients and in subgroups defined by patient literacy/numeracy, stroke risk,  
97 anticoagulation use at baseline, and type of clinic. As safety outcomes, we will monitor  
98 serious bleeding or strokes requiring medical attention.

99

100 **2.0 Background and Significance**

101

102 Atrial fibrillation is the most common cardiac arrhythmia affecting ~3 million Americans<sup>1,2</sup> It  
103 accounts for ~\$26 billion/year in healthcare costs.<sup>3</sup> AF-related thromboembolic strokes are  
104 often devastating and a cause of great physical, social and economic burden.<sup>4-7</sup> Vitamin K

105 antagonists (VKAs, e.g., warfarin) reduce the risk of stroke by ~68%.<sup>8-13</sup> Recently, non-  
106 VKAs oral anticoagulants (NOACs) that directly inhibit factor Xa (e.g., rivaroxaban,  
107 apixaban, edoxaban) or thrombin (dabigatran) have demonstrated similar to or better efficacy  
108 and safety than warfarin.<sup>14-16</sup> Underuse of anticoagulation is a significant quality gap.  
109 Despite patients' strong aversion to strokes,<sup>17,18</sup> <50% of high-risk patients with AF receive  
110 anticoagulants.<sup>19</sup> Of these, 30-50% stop treatment within 12 months.<sup>20-23</sup> The low rate of  
111 anticoagulation suggests that clinicians are challenged in initiating anticoagulation, in part  
112 due to clinicians' aversion to causing anticoagulation-related bleeding,<sup>19,24</sup> Nonadherence  
113 suggests that some patients cannot implement anticoagulation in their lives: warfarin requires  
114 a stable diet and periodic laboratory (INR) monitoring,<sup>25-27</sup> while NOACs are costly and lack  
115 bleeding reversal agents.<sup>14-16</sup> Underuse may result also from poor patient and clinician  
116 access to, and deliberation with, individualized estimates of risks and benefits.<sup>28,29</sup> Patients  
117 and clinicians require support in initiating and implementing anticoagulation therapy.

118  
119 In 2014, three major cardiovascular organizations formulated guidelines for the management  
120 of patients with AF. They gave their strongest class I recommendation for using SDM to  
121 individualize anticoagulation in at-risk AF patients.<sup>30</sup> SDM has the potential to support  
122 patients and clinicians in collaborative deliberation about reasonable anticoagulation  
123 strategies matched to medical risk and patient circumstance.<sup>30-32</sup> Nevertheless, this  
124 recommendation is based on expert consensus (level C evidence) and translating it into  
125 practice is challenging. The guideline provides no guidance on how to achieve this, and no  
126 tools were available that are both up-to-date and proven to support SDM in this context.  
127 Furthermore, we do not know what effect SDM may have on anticoagulation rates and  
128 adherence in patients with AF.<sup>30</sup>

129  
130 We have developed and pilot tested a new online SDM tool (Anticoagulation Choice) to  
131 implement the 2014 class I recommendation in usual practice. The tool promotes a SDM  
132 conversation in the clinical encounter between the expert on important issues that bear on  
133 adherence, the patient, and the expert in medical issues, the clinician. Deliberating together  
134 on patient-important issues and medical matters, patients and clinicians can arrive at an  
135 evidence-based option that patients' value and can implement. Building on this experience,

136 we propose to implement SDM using the Anticoagulation Choice tool and evaluate its impact  
137 on SDM quality and on the rate by which patients take up anticoagulation and implement it  
138 in their lives.

139

### 140 **3.0 Preliminary Work**

141

142 The anticoagulation decision requires a conversation that discusses *both* the patient’s risk of  
143 strokes and the issues that distinguish agents by fit with patient goals and situation. Using our  
144 user-centered design process, we created Anticoagulation Choice, a decision aid designed to  
145 support the recommendation for SDM for anticoagulation in AF. The development of the  
146 anticoagulation choice tool was built on 10 years of experience in designing decision aids  
147 that promote shared decision making and provide evidence-based content. The evidence-  
148 based content for this tool comes from systematic and expert reviews of randomized trials,  
149 observational studies, and qualitative studies.<sup>30, 33-42</sup> Simultaneously, we conducted 16 direct  
150 observations in primary and specialty clinics of clinical encounters in which anticoagulation  
151 decisions took place. The goal of these observations was to identify areas of opportunity to  
152 improve extant conversations.<sup>43</sup> The first “low-fidelity prototype”<sup>44</sup> was a rough-draft paper  
153 version and was field-tested within 8 clinical encounters. Iterations followed, first on paper,  
154 and then electronically, seeking to achieve patient engagement in the conversation. We  
155 judged this to have taken place when patients asked questions or made statements  
156 considering how anticoagulation would play out in their daily lives. An electronic version  
157 was necessary to ensure risk tailoring for each patient and to facilitate updating (we designed  
158 the tool to accommodate new evidence and new agents) and distribution. The online version  
159 supports conversations with patients who are new to anticoagulation as well as former and  
160 current warfarin users. Its use in field-testing required minimal support. The baseline risk,  
161 tailored to the patient using the CHA<sub>2</sub>DS<sub>2</sub>-VASc score (a tool that estimates risk of stroke), is  
162 shown using words, numbers, and a 100-person pictograph along with the expected risk  
163 reduction with anticoagulation. If this benefit is compelling to the patient consideration  
164 moves on to the salient issues differentiating the available options. The issue cards include  
165 the risk of bleeding (based on HASBLED, a tool that estimates risk of bleeding), availability  
166 of reversal agents, and practical considerations. Practical considerations include how each

167 choice affects patients' ability to be active, to travel, to eat a variety of meals, how the  
168 medicine is taken and its effects monitored, and what are the out-of-pocket costs. The final  
169 version of the tool is focused on the discussion of these issues after considering the risk of  
170 stroke and the risk reduction with anticoagulation. The tool is web-based and will be  
171 integrated where possible with the electronic workflow.

172

#### 173 **4.0 Research Design & Methods**

174

175 We will conduct a multicenter randomized trial at the patient level comparing the  
176 Anticoagulation Choice tool and standard care versus standard care alone where enrolled  
177 clinicians will administer the intervention among patients with nonvalvular AF deemed at  
178 high risk of thromboembolic strokes. The study will assess the impact of the interventions on  
179 SDM quality and impact on anticoagulation use as well as monitoring safety concerns of  
180 strokes and bleeds. Also, as part of this trial, clinician training sessions will be evaluated to  
181 describe the normalization process of anticoagulation decision aid in the clinical sites. Data  
182 collection will include medical record review, survey completion, and note taking or  
183 video/audio recording of the clinical encounter and training sessions.

184

#### 185 **4.1 Schema**

186

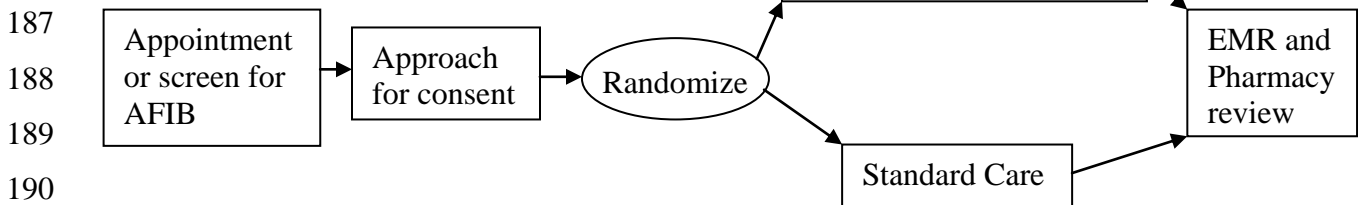

#### 192 **4.2 Study Setting and Participation**

193

194 The trial will take place in clinics at Mayo Clinic (academic medical center), Park Nicollet  
195 Health Partners (urban/suburban community medical center), Hennepin County Medical  
196 Center (safety-net inner-city medical center), UAB Medicine - The University of Alabama at

197 Birmingham and University of Mississippi Medical Center that treat patients with atrial  
198 fibrillation.

199

200 At each recruiting location designated site staff will be trained to review informed consent  
201 documents and obtain necessary signatures from patients and clinicians and will be observed  
202 doing so, by study personnel or research staff, prior to actually consenting patients or clinicians.

203

#### 204 4.2.1 Eligibility Criteria for Clinicians

205

206 All clinicians (MDs, NP/PAs, PharmDs) that are responsible for the modality of  
207 Anticoagulation in eligible AF patients at participating sites, without exclusion.

208

##### 209 4.2.1.1 Enrollment of Clinicians

210

211 The research team and site champions will present an overview of the study at a department  
212 meeting. The informed consent document will be reviewed with interested clinicians before  
213 the clinician receives training on using the decision aid at the initial recruitment meeting or at  
214 their convenience throughout the duration of the study, prior to their first enrolled patient.  
215 Study staff will observe the clinician trainings, described in 4.2.1.2. The clinician will have  
216 the option to consent to recordings (video/audio or audio only) of clinical encounters with  
217 enrolled patients. If the clinician declines to do the recording they are still eligible for  
218 participation within the study. If the clinician agrees to recording of the clinical encounters  
219 on the consent they can still decline at time of the clinical encounter.

220

221 The study coordinator will quickly setup and start recording before leaving the room. The  
222 participants can stop this recording (video, aimed at the desk, or audio when the video  
223 camera is aimed at the ceiling) at any time (the device has a large red start/stop button and an  
224 on/off indicator light).

225

226 Consent only needs to occur one time (prior to being trained to use the decision aid and prior  
227 to the visit with the first enrolled patient). There will be no monetary or other sort of

228 reimbursement for clinicians participating in the trial. The participation of clinicians as  
229 subjects will not affect their current or future employment or be shared with their supervisor.

#### 230 4.2.1.2 Training of Clinicians

231  
232 Study personnel will do a demonstration in the use of the decision aid during in-person  
233 visits with participating clinics. Training session proceedings will be documented using  
234 discretionary video photographing, recording, or note-taking. Clinicians will complete a  
235 brief survey after trainings to describe promoting and inhibiting factors to the  
236 normalization of the anticoagulation decision aid in clinical practice. Similarly, transcripts  
237 and notes from trainings will undergo qualitative analysis to identify promoting and  
238 inhibiting factors to the implementation of the shared decision making tool in the clinical  
239 sites. Study personnel may also do a reminder of how to use the decision aid as needed  
240 (including just-in-time training) or in response to deviations in the quality of delivery  
241 observed on video/audio recordings. Brief video clips and storyboards that demonstrate the  
242 basic use of decision aids are publicly available at <http://shareddecisions.mayoclinic.org> for  
243 clinicians to review at their convenience.

244  
245

#### 246 4.2.2 Eligibility Criteria for Patients

247

248 Each criterion must be addressed and documented in the patient's case report form for  
249 eligibility assessment by the study coordinator. No waivers or exemptions to any eligibility  
250 criteria will be permitted.

251

##### 252 **Inclusion Criteria:**

- 253 1.  $\geq 18$  years of age
- 254 2. Nonvalvular AF deemed at high risk of thromboembolic strokes (CHA<sub>2</sub>D<sub>2</sub>-VAsc  
255 Score  $\geq 1$  in men, or 2 in women).
- 256 3. Able to read and understand (despite cognitive, sensorial, hearing or language  
257 challenges) the informed consent document as determined by the study coordinator  
258 during consent.



259

260 **Exclusion Criterion**

- 261 1. Clinician indicates that patient is not a candidate for a discussion about  
262 anticoagulation medication.  
263 2. Cognitive impairments  
264 3. Mechanical values  
265 4. Left appendage occlusion devices (example: Watchman)  
266 5.

267

268 4.2.3 Identification of Subjects

269

270 Participants for all aims will be patients, their caregivers when pertinent, and clinicians.  
271 Participation is completely voluntary and we have procedures in place, sanctioned by the Mayo  
272 Clinic Institutional Review Board, Hennepin County Medical Center Institutional Review Board  
273 (HCMC), Park Nicollet Health Partners Institutional Review Board, UAB Medicine - The  
274 University of Alabama at Birmingham Institutional Review Board and University of Mississippi  
275 Medical Center Institutional Review Board to ensure that participants have the opportunity to opt  
276 out at any time and will not be further approached for participation or to provide data.

277

278 At the Mayo Clinic site, upcoming appointment lists for Atrial Fibrillation (AF) patients in  
279 primary care, cardiology, neurology, thrombophilia and anticoagulation clinics ECG result  
280 lists, medical records and clinician referrals will be reviewed for patient eligibility. Eligible  
281 patients will be approached and recruited in person, in a private location (i.e., clinic/exam  
282 room) prior to their appointment. Consent will occur by a trained research member as long  
283 as needed and until all questions by the subject have been answered. All study activities  
284 will occur within scheduled appointments, avoiding the need for additional research visits.

285

286 The patient and caregivers (if present), will be asked to provide consent to the recording  
287 (video/audio or audio only) of the clinical encounter. If the patient chooses to decline the  
288 recording they are still eligible to participate in the study. The study coordinator will  
289 quickly setup and start recording before leaving the room. The participants can stop this

290 recording (video, aimed at the desk, or audio when the video camera is aimed at the  
291 ceiling) at any time (the device has a large red start/stop button and an on/off indicator  
292 light).

293  
294 The consent process will include the patient signing authorization to release protected  
295 health information forms to allow study personnel to obtain pharmacy prescription records  
296 and medical records from outside clinics. If a patient declines to sign an authorization form,  
297 he/she will still be eligible for the study but will be excluded from the analysis where  
298 information about medication and/or other medical records use is necessary (i.e. adherence  
299 analysis). The research team will contact the pharmacies and outside clinics for follow-up,  
300 so the patient will not be burdened with additional measures. There will be no monetary or  
301 other sort of reimbursement for participants.

302

### 303 **4.3 Registration and Randomization of Patients**

304

305 Prior to registering patients to the study, all of the eligibility criteria on the eligibility  
306 checklist will have been met.

307

308 Patients will be randomized by the study coordinator after completion of standard informed  
309 consent for participation in clinical research including permission to use protected health  
310 information.

311

312 Registration/randomization is available via REDCap  
313 (<https://redcap1.mayo.edu/redcap/index.php>), this is a secure, web-based application that is  
314 HIPPA compliant. Registration/randomization is available 24 hours a day via the REDCap  
315 website. Site staff will be provided a login and password by the study statistician.

316

317 Prior to accessing the REDCap website, site staff should verify the following:

- 318 • All eligibility criteria have been met.
- 319 • Informed consent has been obtained.
- 320 • Site staff has access to REDCap.

321  
 322  
 323  
 324  
 325  
 326  
 327  
 328  
 329  
 330  
 331  
 332  
 333  
 334  
 335  
 336  
 337  
 338  
 339  
 340

**4.4 Intervention**

In the intervention group, clinicians will conduct the encounter per standard care procedures with the addition of having access to the Anticoagulation Choice tool. The tool will be accessed online or through an available link in the Electronic Medical Record (EMR). Patient information to complete the calculators of risk (CHA<sub>2</sub>DS<sub>2</sub>-VASc) and bleeding (HAS-BLED; if needed) are: history of hypertension, congestive heart failure, stroke, vascular disease, diabetes mellitus, renal disease, liver disease, prior or predisposition to bleeding, unstable and/or high INR, whether the patient takes a medication predisposing him or her to bleeding, and the number of alcoholic drinks per week will be entered by the clinician into the tool or will be uploaded from the patients EMR to the tool and a personalized risk will be calculated (**Table 1**). CHA<sub>2</sub>DS<sub>2</sub>-VASc score of 0: recommend no antithrombotic therapy. CHA<sub>2</sub>DS<sub>2</sub>-VASc score of 1: recommend antithrombotic therapy with oral anticoagulation or antiplatelet therapy but preferably oral anticoagulation. CHA<sub>2</sub>DS<sub>2</sub>-VASc score  $\geq 2$ : recommend oral anticoagulation.<sup>2</sup> A HAS-BLED score of  $\geq 3$  indicates that caution is warranted when prescribing oral anticoagulation and regular review is recommended.<sup>2</sup> Patients can request to receive a printed copy of the tool from their clinician which they can use later to share their decision with others, and to review, confirm or revisit their decision.

341  
 342  
 343  
 344  
 345

**Table 1. Assessment of Stroke (CHA<sub>2</sub>DS<sub>2</sub>-VASc)<sup>14</sup> and Bleeding Risk (HAS-BLED)<sup>15</sup> in Atrial Fibrillation Patients**

| CHA <sub>2</sub> DS <sub>2</sub> -VASc | Score | HAS-BLED                                       | Score  |
|----------------------------------------|-------|------------------------------------------------|--------|
| Congestive heart failure               | 1     | Hypertension (SBP >160 mm Hg)                  | 1      |
| Hypertension                           | 1     | Abnormal renal and liver function <sup>b</sup> | 1 or 2 |
| Age $\geq 75$ y                        | 2     | Stroke                                         | 1      |
| Diabetes mellitus                      | 1     | Bleeding tendency/predisposition <sup>c</sup>  | 1      |
| Stroke/TIA/TE                          | 2     | Labile INRs (if on warfarin) <sup>d</sup>      | 1      |
| Vascular disease <sup>a</sup>          | 1     | Elderly (e.g., age >65 y)                      | 1      |
| Aged 65 to 74 y                        | 1     | Drugs or alcohol (1 point each) <sup>e</sup>   | 1 or 2 |
| Sex category (i.e., female sex)        | 1     |                                                |        |

|               |   |               |   |
|---------------|---|---------------|---|
| Maximum score | 9 | Maximum score | 9 |
|---------------|---|---------------|---|

Acronym def.: TIA indicates transient ischemic attack; TE, thromboembolic; and INR, international normalized ratio.

- a- Prior myocardial infarction (MI), peripheral artery disease (PAD), or aortic plaque.
- b- Abnormal renal function is classified as the presence of chronic dialysis, renal transplantation, or serum creatinine  $\geq 200$  mmol/L. Abnormal liver function is defined as chronic hepatic disease (eg, cirrhosis) or biochemical evidence of significant hepatic derangement (bilirubin 2 to 3 times the upper limit of normal, in association with aspartate aminotransferase/alanine aminotransferase/alkaline phosphatase 3 times the upper limit normal, etc). 1 point for each.
- c- History of bleeding or predisposition (anemia).
- d- Labile INR (ie, time in therapeutic range <60%).
- e- Concomitant antiplatelets or nonsteroidal anti-inflammatory drugs, or excess alcohol.

#### 4.5 Standard Care

The clinician will conduct the encounter per their standard of care. As access to the tool will be available to ensure contamination does not occur the study coordinator will inform the clinician prior to entering the room that the patient is to receive standard care and that the tool is not to be accessed.

#### 4.6 Data Collection

Patients approached by study staff that agrees to participation will be captured in the remote data capture system (REDCap<sup>45</sup>). Potential eligible patients found to be ineligible or eligible but decline participation will be captured in a recruitment tracking log. The reason for ineligibility or reason for decline will be captured along with patients' age, sex, and race/ethnicity.

Self-reported responses from patients and clinicians will be collected at the end of the clinical encounter. At the time of their enrollment clinicians will complete a survey that collects data on their demographics. The post baseline survey will be given to the patient and clinician to complete at the clinic at the end of the encounter by the study coordinator or site appointed staff. Patients may be given the option to fill out part of the survey, prior to their visit if time allows. If a patient requests a return envelope, one will be provided to return the survey by mail. If the survey is not received in the 10 days post encounter a

382 reminder will be mailed to them with a copy of the survey along with a return envelope. A  
383 courtesy call will be made within 5 days post the mailing. Every effort will be made to  
384 complete the survey at the clinic immediately post encounter as this is the best chance for  
385 complete data collection. Another option for patients will be to have a follow up phone call  
386 approximately 1-2 days after their clinical encounter, to remind the patient to send their  
387 survey back or they will be given the option to complete their survey over the phone at that  
388 time.

389  
390 Data from the medical record will be abstracted for all enrolled patients to capture  
391 demographic, clinical and medication prescription data. The time frame for collection will  
392 be from prior to enrollment to 12 months post enrollment. For patients that do not have  
393 any encounters at the institution for the past 12 months, a scan will be conducted up to 6  
394 months after the 12-month timeline to verify continuity of care at the institution, change in  
395 contact information and/or survival status. If no records are available at that time, we will  
396 call the patient (number of attempts as authorized by each IRB), followed by a postal  
397 survey if nonresponse persist.

398  
399 Data to be collected on patients include variables necessary to estimate the risk of stroke  
400 and bleeding, age, gender, BMI, smoking status, alcohol consumption, marital status,  
401 annual income of household, highest level of education, residency (nursing home), location  
402 of primary healthcare and total number of medications patients is currently taking. To  
403 further characterize the patients, we will use Chew et al single-item health literacy  
404 screener,<sup>46</sup> a 4-item modified Subjective Numeracy Scale,<sup>47, 48</sup> and a single-item health  
405 status measure.<sup>49</sup>

406  
407 We will collect information on past use of anticoagulants through medical record review.  
408 We will categorize the patients into two cohorts for descriptive and analytical purposes.  
409 For patients who are not using an anticoagulant at the time of trial participation will form  
410 the 'Start' cohort. They may have used anticoagulation and discontinued >6 months ago,  
411 never used anticoagulation, or are using aspirin only. Patients that began an anticoagulant

412 within the past 10 days of the enrolled encounter that were prescribed an anticoagulant  
 413 within the emergency department or an inpatient visit will still be considered a new ‘Start’.

414  
 415 Patients who are on warfarin or NOACs or used them in the past 6 months will form the  
 416 ‘Review’ cohort. This cohort may include patients who have difficulty maintaining a  
 417 therapeutic INR, or patients considering switching to a different anticoagulant or to stay on  
 418 warfarin but switch to home INR monitoring.

419  
 420 The post consent survey for clinicians will collect demographic data (age, gender,  
 421 specialty, % of their practice dedicated to anticoagulation care).

422  
 423 **Calendar of Events**

|                                               | <b>Prior to Study Enrollment</b> | <b>Prior to Encounter</b> |                                                                                              | <b>Post Encounter</b> | <b>12 months Post Enrollment</b> |
|-----------------------------------------------|----------------------------------|---------------------------|----------------------------------------------------------------------------------------------|-----------------------|----------------------------------|
| <b>Patient Completed Forms</b>                |                                  |                           | <b>R<br/>A<br/>N<br/>D<br/>O<br/>M<br/>I<br/>Z<br/>E<br/>D<br/>T<br/>R<br/>I<br/>E<br/>S</b> |                       |                                  |
| Informed Consent                              | X                                |                           |                                                                                              |                       |                                  |
| Pharmacy Consent                              | X                                |                           |                                                                                              |                       |                                  |
| Survey                                        |                                  |                           |                                                                                              | X                     |                                  |
| Phone <sup>1</sup>                            |                                  |                           |                                                                                              |                       | X                                |
| <b>Clinician Completed Forms</b>              |                                  |                           |                                                                                              |                       |                                  |
| Informed Consent                              | X                                |                           |                                                                                              |                       |                                  |
| Survey                                        |                                  | X                         |                                                                                              | X                     |                                  |
| <b>Clinical Data Abstracted from EMR</b>      |                                  |                           |                                                                                              |                       |                                  |
| Bleeds                                        |                                  |                           |                                                                                              |                       | X                                |
| Strokes                                       |                                  |                           |                                                                                              |                       | X                                |
| INR Tests (# and values outside of 2-3 range) |                                  |                           |                                                                                              |                       | X                                |
| Anticoagulation Prescription                  |                                  | X                         |                                                                                              | X                     | X                                |
| <b>Pharmacist Request</b>                     |                                  |                           |                                                                                              |                       |                                  |
| Anticoagulation                               |                                  |                           |                                                                                              |                       | X <sup>2</sup>                   |

|     |  |  |  |  |  |
|-----|--|--|--|--|--|
| Use |  |  |  |  |  |
|-----|--|--|--|--|--|

- 424 1- Patients who do not have utilization within enrolling healthcare system will be contacted via phone for  
425 verification of safety data (strokes and bleeds). If no information in the record and follow-up is necessary  
426 we will call patients the maximum number allowed by the IRB followed by a postal survey  
427 2- Pharmacist records will be requested for 12 months prior to enrollment through 10 months post enrollment.  
428

## 429 **4.7 Outcome Measures**

430

### 431 4.7.1 SDM quality

432

433 SDM quality will measure (a) knowledge transfer; (b) concordance; (c) quality of  
434 communication and satisfaction with shared decision making; and (d) satisfaction with the  
435 decision-making process.

436

437 Knowledge transfer is 6 questions about AF and anticoagulation. The 6 questions use a  
438 response format “true / false / do not know”, and are answered with full access to the  
439 decision aids since they are not meant to test recall. Correct responses will be summed and  
440 divided by the total number of questions asked. If a patient answers at least 1 knowledge  
441 question then they will be assessed for this outcome, where all missing responses will be  
442 coded as incorrect.

443

444 Knowledge of risk will contain one question that asks patients to estimate their own risk of  
445 stroke. Correct answers will be within  $\pm 10\%$  (strict score) and  $\pm 30\%$  (liberal score)  
446 *relative* to the calculated risk estimate.

447

448 Collaborative agreement will assess decision concordance between the patient and the  
449 clinician. Both the patient and clinician will be asked to report about what decision  
450 (anticoagulation no/yes-which one) was made during the index visit. Agreement will be  
451 calculated between both parties and reported.

452

453 Patient decision satisfaction will be assessed using the Decisional Conflict Scale (DCS).<sup>50</sup>

454 <sup>51</sup> The 16 items of DCS are scored on a 0-4 scale; the items are summed, divided by 16 and

455 then multiplied by 25. The scale is from 0-100 where higher scores are reflective of  
456 uncertainty about the choice. There are 5 DCS subscales, where a DCS subscale consists of  
457 3 questions (1 subscale of 4). If 2 of 3 (or 3 of the 4) questions within a subscale have  
458 responses, then the patient would be considered as a responder and a score could be  
459 calculated. If more than one response per subscale is missing then that specific subscale is  
460 not calculated for the patient. An overall DCS score can be calculated if no more than 5  
461 responses are missing as long as each missing response falls into a different subscale.

462  
463 Quality of Communication will be assessed with a modified version of three questions  
464 from the CAHPS Clinician and Group survey<sup>52</sup>. CAHPS surveys include questions to  
465 assess patient perspectives of communication with their clinician. These questions indicate  
466 the extent to which the communication is patient-centered. Three questions ask about  
467 specific aspects of technical (explain things in a way you could understand) and affective  
468 (show respect for what you have to say) communication. Each item is assessed on a 3  
469 point scale (Yes, definitely; Yes, somewhat and No) that will be individually reported, no  
470 composite score will be done. Three modifications are made to improve the relevance of  
471 the items to the present study: (1) Instructions were changed from “These questions ask  
472 about your most recent visit with this doctor. Please answer only for your own health care.”  
473 to “Thinking of the conversation you just had with your clinician about blood thinners  
474 (anticoagulation medications), please select the most appropriate response to each item  
475 below.” (2) “During your most recent visit” was removed from the item stems. (3) “This  
476 doctor” was replaced with “this clinician.”

477  
478 Patient satisfaction with encounter will be assessed with 1 question on a 7 point likert scale.  
479 Patients will be asked whether they would recommend the approach used to others for  
480 other discussions.

481  
482 Clinician satisfaction with encounter will be assessed with 2 questions. A 5 point likert  
483 scale questioning satisfaction with discussion about anticoagulation medication choice.  
484 The clinician will also be asked whether they would recommend the approach used to other  
485 clinicians for other discussions on a 7 point Likert scale.



486

487 4.7.2 SDM processes

488

489 To assess SDM processes the recordings of the clinical encounter will be evaluated  
490 (video/audio or audio only recordings).

491

492 Extent of SDM that took place during the encounter will be assessing the degree of  
493 involvement of patients by the clinician in SDM using the OPTIONS scale.<sup>53</sup> The scale  
494 consists of 12 items scored from 0, no effort to 4, exemplary effort. The 12 items are  
495 summed and converted to a 100 point scale. A sample of 20% of the recordings will be  
496 assessed by two or more reviewers. Agreement will be assessed by Lin's concordance  
497 index<sup>54</sup>, where any value over 0.8 will be considered concordant. If concordance does not  
498 occur within the first 20%, the two reviewers will assess cases of difference and review an  
499 additional 10 cases to test for agreement. Recordings scored by both reviewers will be  
500 averaged.

501

502 Impact of SDM on Encounter will be assessed by comparing the length in minutes of the  
503 discussion about anticoagulation and of the office visit, when available. Study coordinators  
504 when possible will time the encounters in intervention and control visits, prioritizing those  
505 encounters in which recording was not allowed. Potential issues preventing assessment of  
506 time may be recruitment of another patient.

507

508 Fidelity of SDM Tool by the clinician will be assessed by a review of the recording looking  
509 for key items to be addressed. A checklist of key elements will be assessed in both arms to  
510 assess not only the fidelity but potential contamination. A sum of the components in the  
511 checklist will be calculated for each recording and compared between arms. To score the  
512 recording first a sample of 20% of the video's will be assessed by two reviewers.

513 Agreement will be assessed by Lin's concordance index<sup>54</sup>, where any value over 0.8 will be  
514 considered concordant. If concordance does not occur within the first 20%, the two  
515 reviewers will assess cases of difference and review an additional 10 cases to test for  
516 agreement. Recordings scored by both reviewers will be averaged. For encounters where

517 audio and video recording has been declined, a real-time assessment will occur at the  
518 consent of the clinician and the patient. The study coordinator will conduct these real-time  
519 reviews.

520  
521 Inclusion of Cost as an Element of SDM Process will be assessed by first using qualitative  
522 inductive content analysis of the transcripts of video-recorded clinical encounters to  
523 describe the scope of cost conversations. Deductive video-graphic analyses will be used to  
524 code the occurrence of cost conversation themes in order to determine the impact that  
525 Anticoagulation Choice has on the appearance of these themes, controlling for individual  
526 characteristics and contexts, and the association between cost conversation themes and  
527 SDM quality (described above), SDM Processes (described above), and Anticoagulation  
528 Use (described below).

529

530

#### 531 4.7.3 Anticoagulation Use

532

533 Rate of anticoagulation: The key indicator of the choice to start an anticoagulant will be  
534 its prescription in the EMR prescription module (observed discussions and  
535 patient/clinician accounts may not reflect decisions confirmed after the visit with a  
536 prescription, for example, after the clinician or the patient checked other information or  
537 with other informants). After this primary ‘decided as prescribed’ approach, we will  
538 conduct secondary analyses using patient/clinician reported and video-observed  
539 decisions. Decisions may be for starting or not an anticoagulant in the start cohort. It is  
540 possible that there may be some decisions to stop anticoagulation in the review cohort,  
541 but we expect start and review cohorts to contribute information about choice of  
542 anticoagulant.

543

544 Choice of anticoagulant: We will review the EMR and 10-month pharmacy profiles  
545 (to stand for the 12-month profile given the automatic expiration of  
546 pharmacy records at 1 year) to determine the prescribed anticoagulant and  
547 whether and when switches to another agent or to no anticoagulant took place.

548 Together, they should capture choice and switches even when these occur as a result of  
549 changes in clinician (e.g., from cardiology to primary care). When available, we will  
550 note the documented reasons from clinical notes for choosing and switching as well as  
551 with which clinician the change was made (e.g primary, cardiology, etc.).

552

553 Anticoagulation persistence: Patients will identify the pharmacy(-ies) they use to fill  
554 their prescriptions and authorize us to obtain their prescription drug fill data. We will  
555 calculate anticoagulation persistence, using the percent days covered (PDC) based on  
556 prescription refill behaviors (total days supply of anticoagulant filled / total days of  
557 observation from the first prescription fill date; range 0-100%). We will also pull all  
558 pharmacy refills for the 12 months prior to enrollment. This will allow us to calculate  
559 persistence for prior use of anticoagulants for the review cohort to compare to persistence  
560 post encounter and see if there is an impact.

561

562 Warfarin use: For patients who choose to stay on warfarin, we will also use as secondary  
563 measures of adherence: (a) the proportion of INR tests obtained/scheduled; and (b)  
564 percentage of time at therapeutic target (typically INR 2-3).

565

#### 566 4.7.4 Safety outcomes

567

568 Strokes and bleeds requiring medical assistance will be monitored and reported to the data  
569 safety monitoring board (section 6.1). Because very few of these are expected, we will rely  
570 on patient/clinician self-report and medical record review 12 months post enrollment for  
571 each participant. Should a patient not have utilization in the 3 months prior to the 12 month  
572 date, then the patient will be contacted directly for confirmation.

573

#### 574 **4.8 Follow-up Guidelines**

575

576 All patients will be followed per protocol guidelines and deviations from protocol will be  
577 reported to the IRB.

578

579 Withdraw: If a patient refuses to continue to participate and they withdraw consent they  
580 will then be considered withdrawn from the study; to uphold the intention-to-treat  
581 principle, we will inquire as to whether we can continue to passively collect data from the  
582 medical record, and if ok from 10-12 month pharmacy profiles and patient surveys. If not,  
583 then no further data will be collected through medical review or self-report. Data collected  
584 prior to withdraw will be utilized unless expressly told otherwise by the patient.

585  
586 Ineligible: If a patient enrolled onto the study has been found ineligible (not meeting one of  
587 the eligibility criteria) they will be documented for reason of ineligible in the study chart.  
588 These patients will continue to receive the intervention and all data will be collected for the  
589 study. This is a safe course of action as the intervention does not pose any potential harm  
590 to the patient beyond loss of privacy. The patients will be identified in the results as being  
591 ineligible and reason but will be included in all analyses.

592  
593 The procedure for post-randomization exclusions will involve presenting the case to the  
594 trial PI blind to the participant's allocation and to their results.

## 595 596 **4.9 Statistical Analysis**

### 597 598 4.9.1 Analysis Plan

599  
600 The study will be analyzed according to the *intention to treat principle (ITT)*, including all  
601 patients enrolled to the study in the arm to which they were assigned, regardless of which  
602 they were assigned to (e.g., standard care or Anticoagulation Choice + Standard Care).  
603 Reporting will include 'Per Protocol', complete data for each arm plus the ITT analysis  
604 where imputation analysis methods will be utilized to address any missing values (see  
605 section 4.9.1.1 for details on missing data analysis). Baseline characteristics will be  
606 reported in the study results with continuous values being reported as means and standard  
607 deviations and categorical values reported as counts and frequencies and compared  
608 between study arms using t-tests and chi-squared tests. Any baseline imbalances ( $p < 0.05$ )  
609 will be will be explored as a possible factor to adjust for when the outcome measures are

610 analyzed. We will adhere to the CONSORT guidelines to transparently report study results  
611 and ensure that sufficient information is included to allow for assessment of the study's  
612 internal and external validity.

613  
614 We will use standard techniques appropriate for trials, with each outcome compared  
615 between study arms using t-tests for continuous outcomes and chi-square tests for  
616 dichotomous outcomes. If there are differences in baseline characteristics found by  
617 statistical means or found to have clinical relevance between the two study groups, these  
618 will be accounted for using regression models which include an indicator for study arm.

619  
620 We will perform descriptive analyses to describe any potential heterogeneity of  
621 treatment effect (HTE) and facilitate synthesis of subgroup results in future meta-  
622 analyses. We will conduct descriptive HTE analyses by clinic (academic, community  
623 and safety net), by cohort (start or review cohort), by stroke risk (CHA2DS2-VASc  
624 score of 1 or  $\geq 2$  for men and 2 or  $\geq 3$  for women), and by numeracy (Less than  
625 adequate vs. not). The outcomes assessed with HTE analyses will be the same as  
626 those assessed in the trial (e.g., SDM and communication quality, knowledge, and  
627 decisional satisfaction).

628  
629 For the main analyses (SDM Quality and SDM Processes), we will not assume that  
630 patient effectiveness outcomes are independent of the clinician, but rather test to see if  
631 patients seen by the same clinician have correlated outcomes. Ignoring such  
632 "clustering" effects would result in over-narrow confidence intervals and potentially  
633 false positive study results. Instead, if clustering is seen, determined by calculating  
634 the intra-class correlation ( $ICC > 0.05$ ) for each outcome, then the value for the  
635 ICC will be reported in findings. We will use cluster (cluster at clinician level)  
636 adjusted t-test and chi-square test for comparisons between arms and hierarchical  
637 generalized linear models (HGLMs) with random main effects specified at the  
638 clinician level when adjusting by more than arm.<sup>55</sup> If clustering is not present then the  
639 results will reduce to a model that assumes independence and reflect findings  
640 appropriately.

641  
642 Some data analysis will be conducted at the Leiden University Medical Center (the Netherlands),  
643 by using remote access connection to the Mayo server and during the appointment time on Mayo  
644 Clinic campus. All data will be stored securely on a password-protected computer. Password-  
645 protected USB drives may also be used to store electronic files in situations where connection to  
646 the Mayo server is limited or unavailable. These USB drives are encrypted and will be used in  
647 accordance with Mayo Clinic's Portable Computing and Telecommunication Devices Policy.  
648 These USB drives may be shared externally to the Leiden University Medical Center (the  
649 Netherlands).

650  
651 4.9.1.1 Missing Data

652 We will make every effort to minimize missing data. Trial enrollment and the fidelity of  
653 follow-up procedures will be reviewed during bi-weekly conference calls. A study  
654 biostatistician will conduct frequency reports to assess for missing data, and the study team,  
655 which is experienced in conducting multicenter trials, will trouble shoot any problems  
656 encountered. We will report rates of missing data for each outcome by study arm and send  
657 missing data reports to sites.  
658

659  
660 4.9.2 Sample Size Estimation

661  
662 *The table shows the detectable* effect for each of the outcomes of interest if we were to  
663 have data on that outcome from a total of 333 patients (1% of available population).  
664 This provides enough power ( $\alpha=0.05$ ; two-sided difference) to detect meaningful  
665 differences across arms for all SDM quality and process outcomes. Our intent,  
666 however, is to have enough power to detect important differences when we conduct  
667 analyses of groups or cohorts of patients. Most of these analyses will divide the  
668 participants into 2 cohorts (e.g., start and review cohorts), except for the subgroup  
669 analysis by clinic, which divides the total sample into 3 cohorts: academic, community,  
670 and safety net clinic. That is the only analysis with three groups. Given this, we  
671 would need 3 times the sample size listed in the table, or **999 participants (3% of**  
672 **available sample)** to address all planned subgroup analyses. These are minimum  
673 targets for recruitment and we do not plan to limit recruitment in any way to enroll up

674 to this number of patients. It assumes even distribution of participants per subgroup  
675 (e.g., start vs. review cohort); since the only grouping with three levels is clinic, each  
676 clinic will be expected to recruit similar numbers. Thus, for the main analysis and for  
677 other subgroup analyses (n=2 levels),  
678

| <b>Outcome (n = 333)</b>               | <b>Rate<br/>(%) or<br/>SD</b> | <b>Detectable<br/>effect</b> | <b>Power*</b> |
|----------------------------------------|-------------------------------|------------------------------|---------------|
| <b>Patient level – SDM quality</b>     |                               |                              |               |
| Knowledge transfer <sup>^</sup>        | 18                            | 5.6                          | 84%           |
| Knowledge of risk                      | 55%                           | 15%                          | 81%           |
| Decisional conflict scale <sup>^</sup> | 17                            | 5.2                          | 80%           |
| <b>Clinician level</b>                 |                               |                              |               |
| Satisfaction <sup>^</sup>              | 54%                           | 15%                          | 80%           |
| <b>Encounter level – SDM process</b>   |                               |                              |               |
| Engagement (OPTION12) <sup>^</sup>     | 12.6                          | 3.9                          | 80%           |

679 <sup>^</sup> Values from iADAPT SDM tool trial; \*  $\alpha=0.05$ ; two-sided

680  
681 We expect approximately 90% of patients to start (start cohort) or continue a medication  
682 (review cohort). Of those, we can reasonably expect to obtain >85% of the  
683 pharmaceutical records for those (records will be requested of all enrolled patients  
684 regardless of decision). Thus, using the trial size estimated of **999 participants**, we will  
685 have ~765 patient records available for assessment of anticoagulant persistence at 12  
686 months (PDC). In our review of the Optum database, 40% of patients were adherent to  
687 anticoagulation (>80% PDC, the threshold used by CMS) at 12 months. Assuming an  
688 expected rate of 60% PDC for the usual care cohort, we would have 80% power to  
689 detect a 9% difference (69% PDC in the SDM tool arm), with a two-sided test and an  
690 alpha of 0.05. In subgroup analyses comprising 100 participants per arm and using a  
691 one-sided test and alpha of 0.05, we will have 80% power to detect differences of at  
692 least 16%.

693  
694 4.9.3 Patient Allocation  
695

696 Eligible patients will be allocated into either the usual care arm or to the usual care +  
697 ANTICOAGULATION CHOICE SDM tool (intervention) arm using a random sequence  
698 the trial statistician will generate *a priori*. The allocation will be stratified by clinic  
699 (academic, community or safety net), by cohort (start or review), and stroke risk  
700 (CHA<sub>2</sub>DS<sub>2</sub>-VASc score of 1 or  $\geq 2$  for men and 2 or  $\geq 3$  for women) using blocks of  
701 random size.

702

## 703 **5.0 Conflict of Interest**

704

705 The tool under evaluation is not part of any existing effort to commercialize or profit from  
706 its use; the researchers involved in this study have not received -- and will not receive with  
707 their application in this study -- any royalties or other monetary benefits, directly or  
708 indirectly, from the use of the decision aids or from the makers of the interventions being  
709 discussed in this tool.

710

## 711 **6.0 Human Subjects**

712

### 713 **6.1 Data safety monitoring board**

714

715 A Data Safety and Monitoring Plan (DSMP) and charter has been formed to  
716 monitor participant safety, data completeness and adherence to study protocol. In  
717 addition, the principal investigator, each of the site investigators and champions,  
718 study statisticians, and project coordinator will meet monthly to assess  
719 recruitment (overall and by site), baseline comparability of treatment groups,  
720 protocol adherence, completeness of data collection, safety, and fidelity of follow-  
721 up procedures. They will meet monthly or as needed to review safety. Any  
722 potential adverse events will be entered into the study database and the  
723 Institutional Review Board will be notified. A Data Safety Monitoring Board  
724 (DSMB) has been formed and will meet bi-annually or as needed  
725 starting just prior to study enrollment.

726



727 **6.2 Population**

728  
729 This study will be available to all eligible patients, regardless of race, gender, or ethnic  
730 origin. There is no information currently available regarding differential outcomes of the  
731 decision aid in subsets defined by race, gender, or ethnicity, and there is no reason to  
732 expect such differences to exist.

733

734 **6.3 Potential Risks**

735  
736 Potential risks to patient subjects should be minimal. Given that the intervention has been  
737 extensively pilot tested and no adverse outcomes occurred, we do not expect early  
738 termination due to harm. The intervention is an educational tool for use during the clinic  
739 visit to help patients make decisions about anticoagulation medications. The tool does not  
740 make recommendations or result in prescriptions without the participation of the clinician,  
741 and the tool is not to be used outside a clinical visit in which a clinician can place the  
742 information in context.

743

744 **6.4 Protection and Confidentiality**

745

746 6.4.1 Subject privacy

747

748 In this study, the privacy of all study participants will be protected by avoiding the use of  
749 names on all research data (including field notes, transcribed conference call, meeting  
750 tapes, audio-and video-recordings of the interviews, transcripts). All study participants will  
751 be identified by a unique study code number only. The link between the code number and  
752 study participant's identity will be stored within the remote data capture system. Medical  
753 records will be abstracted electronically using computers that are not linked to any Mayo  
754 mainframe computer. Names of those who decline participation in the study will be  
755 maintained in a do-not-contact list, so they will not be contacted multiple times (as patients  
756 are likely to have multiple appointments at participating clinics during the study). All  
757 research material outside of what is stored within the remote data capture system will be  
758 maintained on a secure server at the KER Unit at Mayo Clinic and locked in file cabinets.

759

760 6.4.2 Data management

761

762

763

764

765

766

767

768

769

770

771

772

773

774 6.4.3 Video and audio-recordings

775

776

777

778

779

780

781

782

783

784

785

786

787 6.4.4 Registry

788

789

790

All sites will be required to use the current version of all documents and forms and adhere to the study schedule. Forms and documents will be returned to study coordinators via upload to the remote data entry system (REDCap<sup>44</sup>), Fedex or data transfer between sites. Data entry specialists will enter survey and medical record data into the REDCap system which is hosted by Mayo Clinic, which is a HIPAA compliant secure data entry system that allows for validated data entry, edit checks and logs of all data changes. The data can be accessed by the statistical team at any time and downloaded into a statistical software package. The statistical team will review the data on a bi-weekly basis to ensure data accuracy and completeness. All data, documents, and analysis findings will be housed within the Mayo Clinic system that is password protected and backed up on a nightly basis. The data will be stored within the secure system following completion of the study.

Health visits will be recorded (video/audio or audio only) with permission of all participants. These recordings are conducted using a portable digital video camera that is placed aimed at the clinician's desk, away from the physical examination table. The clinician and the patient will be instructed on how to occlude the lens, direct the camera to a wall, or turn off the camera at any time they feel this is appropriate. Digital recordings are immediately transferred and/or uploaded to the research team's secure server and deleted from portable devices after overnight back-up of Mayo's servers. The video and audio files are identified using a code number that does not include the name of the clinician, support staff, or patient or reference to their medical record number or date of birth. All recordings will be transcribed verbatim by an IRB approved transcription service.

Collected study data (including audio and video recordings) will be kept in a registry to conduct further analyses, future un-identified and IRB approved research, trainings, quality

791 improvement and educational purposes, which includes sending data (and recordings) to  
792 research collaborators. The research collaborators will have research appointments with  
793 Mayo Clinic and will only assist in analyzing data; they will not have contact with study  
794 participants.

795

#### 796 6.4.5 IRB Umbrella

797

798 When the study is being kept open for secondary analysis and registry purposes only, this  
799 IRB application may merge to an umbrella IRB application.

800

## 801 7.0 References

802

803

- 804 1. Lloyd-Jones DM, Wang TJ, Leip EP, et al. Lifetime risk for development of atrial  
805 fibrillation: the Framingham Heart Study. *Circulation*. 2004;110(9):1042-1046.
- 806 2. Naccarelli GV, Varker H, Lin J, Schulman KL. Increasing prevalence of atrial fibrillation  
807 and flutter in the United States. *Am J Cardiol*. 2009;104(11):1534-1539.
- 808 3. Kim MH, Johnston SS, Chu BC, Dalal MR, Schulman KL. Estimation of total  
809 incremental health care costs in patients with atrial fibrillation in the United States. *Circ  
810 Cardiovasc Qual Outcomes*. 2011;4(3):313-320.
- 811 4. Lin HJ, Wolf PA, Kelly-Hayes M, et al. Stroke severity in atrial fibrillation. The  
812 Framingham Study. *Stroke*. 1996;27(10):1760-1764.
- 813 5. Lamassa M, Di Carlo A, Pracucci G, et al. Characteristics, outcome, and care of stroke  
814 associated with atrial fibrillation in Europe: data from a multicenter multinational  
815 hospital-based registry (The European Community Stroke Project). *Stroke*.  
816 2001;32(2):392-398.
- 817 6. Feigin VL, Forouzanfar MH, Krishnamurthi R, et al. Global and regional burden of  
818 stroke during 1990- 2010: findings from the Global Burden of Disease Study 2010.  
819 *Lancet*. 2014;383(9913):245-254.
- 820 7. Go AS, Mozaffarian D, Roger VL, et al. Heart disease and stroke statistics--2014 update:  
821 a report from the American Heart Association. *Circulation*. 2014;129(3):e28-e292.
- 822 8. Petersen P, Boysen G, Godtfredsen J, Andersen ED, Andersen B. Placebo-controlled,  
823 randomised trial of warfarin and aspirin for prevention of thromboembolic complications  
824 in chronic atrial fibrillation. The Copenhagen AFASAK study. *Lancet*.  
825 1989;1(8631):175-179.
- 826 9. Ezekowitz MD, Bridgers SL, James KE, et al. Warfarin in the prevention of stroke  
827 associated with nonrheumatic atrial fibrillation. Veterans Affairs Stroke Prevention in  
828 Nonrheumatic Atrial Fibrillation Investigators. *N Engl J Med*. 1992;327(20):1406-1412.

- 829 10. Stroke Prevention in Atrial Fibrillation Study. Final results. *Circulation*. 1991;84(2):527-  
830 539.
- 831 11. Warfarin versus aspirin for prevention of thromboembolism in atrial fibrillation: Stroke  
832 Prevention in Atrial Fibrillation II Study. *Lancet*. 1994;343(8899):687-691.
- 833 12. The effect of low-dose warfarin on the risk of stroke in patients with nonrheumatic atrial  
834 fibrillation. The Boston Area Anticoagulation Trial for Atrial Fibrillation Investigators. *N*  
835 *Engl J Med*. 1990;323(22):1505-1511.
- 836 13. Connolly SJ, Laupacis A, Gent M, Roberts RS, Cairns JA, Joyner C. Canadian Atrial  
837 Fibrillation Anticoagulation (CAFA) Study. *J Am Coll Cardiol*. 1991;18(2):349-355.
- 838 14. Connolly SJ, Ezekowitz MD, Yusuf S, et al. Dabigatran versus warfarin in patients with  
839 atrial fibrillation. *N Engl J Med*. 2009;361(12):1139-1151.
- 840 15. Patel MR, Mahaffey KW, Garg J, et al. Rivaroxaban versus warfarin in nonvalvular atrial  
841 fibrillation. *N Engl J Med*. 2011;365(10):883-891.
- 842 16. Granger CB, Alexander JH, McMurray JJ, et al. Apixaban versus warfarin in patients  
843 with atrial fibrillation. *N Engl J Med*. 2011;365(11):981-992.
- 844 17. Haynes RB, Devereaux PJ, Guyatt GH. Clinical expertise in the era of evidence-based  
845 medicine and patient choice. *Vox Sang*. 2002;83 Suppl 1:383-386.
- 846 18. Lahaye S, Regpala S, Lacombe S, et al. Evaluation of patients' attitudes towards stroke  
847 prevention and bleeding risk in atrial fibrillation. *Thromb Haemost*. 2014;111(3):465-473.
- 848 19. Ogilvie IM, Newton N, Welner SA, Cowell W, Lip GY. Underuse of oral anticoagulants  
849 in atrial fibrillation: a systematic review. *Am J Med*. 2010;123(7):638-645 e634.
- 850 20. Gallagher AM, Rietbrock S, Plumb J, van Staa TP. Initiation and persistence of warfarin  
851 or aspirin in patients with chronic atrial fibrillation in general practice: do the appropriate  
852 patients receive stroke prophylaxis? *J Thromb Haemost*. 2008;6(9):1500-1506.
- 853 21. Hylek EM, Evans-Molina C, Shea C, Henault LE, Regan S. Major hemorrhage and  
854 tolerability of warfarin in the first year of therapy among elderly patients with atrial  
855 fibrillation. *Circulation*. 2007;115(21):2689-2696.
- 856 22. Mant J, Hobbs FD, Fletcher K, et al. Warfarin versus aspirin for stroke prevention in an  
857 elderly community population with atrial fibrillation (the Birmingham Atrial Fibrillation  
858 Treatment of the Aged Study, BAFTA): a randomised controlled trial. *Lancet*.  
859 2007;370(9586):493-503.
- 860 23. Rash A, Downes T, Portner R, Yeo WW, Morgan N, Channer KS. A randomised  
861 controlled trial of warfarin versus aspirin for stroke prevention in octogenarians with  
862 atrial fibrillation (WASPO). *Age Ageing*. 2007;36(2):151-156.
- 863 24. Glazer NL, Dublin S, Smith NL, et al. Newly detected atrial fibrillation and compliance  
864 with antithrombotic guidelines. *Arch Intern Med*. 2007;167(3):246-252.
- 865 25. Platt AB, Localio AR, Brensinger CM, et al. Can we predict daily adherence to  
866 warfarin?: Results from the International Normalized Ratio Adherence and Genetics (IN-  
867 RANGE) Study. *Chest*. 2010;137(4):883-889.

- 868 26. Couris R, Tataronis G, McCloskey W, et al. Dietary vitamin K variability affects  
869 International Normalized Ratio (INR) coagulation indices. *Int J Vitam Nutr Res.*  
870 2006;76(2):65-74.
- 871 27. Franco V, Polanczyk CA, Clausell N, Rohde LE. Role of dietary vitamin K intake in  
872 chronic oral anticoagulation: prospective evidence from observational and randomized  
873 protocols. *Am J Med.* 2004;116(10):651-656.
- 874 28. Seaburg L, Hess EP, Coylewright M, Ting HH, McLeod CJ, Montori VM. Shared  
875 decision making in atrial fibrillation: where we are and where we should be going.  
876 *Circulation.* 2014;129(6):704-710.
- 877 29. Devereaux PJ, Anderson DR, Gardner MJ, et al. Differences between perspectives of  
878 physicians and patients on anticoagulation in patients with atrial fibrillation:  
879 observational study. *Bmj.* 2001;323(7323):1218-1222.
- 880 30. January CT, Wann LS, Alpert JS, et al. 2014 AHA/ACC/HRS guideline for the  
881 management of patients with atrial fibrillation: a report of the American College of  
882 Cardiology/American Heart Association Task Force on Practice Guidelines and the Heart  
883 Rhythm Society. *J Am Coll Cardiol.* 2014;64(21):e1-76.
- 884 31. Charles C, Gafni A, Whelan T. Decision-making in the physician-patient encounter:  
885 revisiting the shared treatment decision-making model. *Soc Sci Med.* 1999;49(5):651-  
886 661.
- 887 32. Montori VM, Gafni A, Charles C. A shared treatment decision-making approach between  
888 patients with chronic conditions and their clinicians: the case of diabetes. *Health Expect.*  
889 2006;9(1):25-36.
- 890 33. McGrath ER, Kapral MK, Fang J, et al. Association of atrial fibrillation with mortality  
891 and disability after ischemic stroke. *Neurology.* 2013;81(9):825-832.
- 892 34. Clarkesmith DE, Pattison HM, Lane DA. Educational and behavioural interventions for  
893 anticoagulant therapy in patients with atrial fibrillation. *Cochrane Database Syst Rev.*  
894 2013;6:CD008600.
- 895 35. Gomez-Outes A, Terleira-Fernandez AI, Calvo-Rojas G, Suarez-Gea ML, Vargas-  
896 Castrillon E. Dabigatran, Rivaroxaban, or Apixaban versus Warfarin in Patients with  
897 Nonvalvular Atrial Fibrillation: A Systematic Review and Meta-Analysis of Subgroups.  
898 *Thrombosis.* 2013;2013:640723.
- 899 36. Salazar CA, del Aguila D, Cordova EG. Direct thrombin inhibitors versus vitamin K  
900 antagonists for preventing cerebral or systemic embolism in people with non-valvular  
901 atrial fibrillation. *Cochrane Database Syst Rev.* 2014;3:CD009893.
- 902 37. Lapner S, Cohen N, Kearon C. Influence of sex on risk of bleeding in anticoagulated  
903 patients: a systematic review and meta-analysis. *J Thromb Haemost.* 2014;12(5):595-605.
- 904 38. Biondi-Zoccai G, Malavasi V, D'Ascenzo F, et al. Comparative effectiveness of novel  
905 oral anticoagulants for atrial fibrillation: evidence from pair-wise and warfarin-controlled  
906 network metaanalyses. *HSR Proc Intensive Care Cardiovasc Anesth.* 2013;5(1):40-54.
- 907 39. Verdecchia P, Angeli F, Bartolini C, et al. Safety and efficacy of non-vitamin K oral  
908 anticoagulants in non-valvular atrial fibrillation: a Bayesian meta-analysis approach.  
909 *Expert Opin Drug Saf.* 2015;14(1):7-20.

- 910 40. Limone BL, Baker WL, Kluger J, Coleman CI. Novel anticoagulants for stroke  
911 prevention in atrial fibrillation: a systematic review of cost-effectiveness models. *PLoS*  
912 *One*. 2013;8(4):e62183.
- 913 41. Zhu WG, Xiong QM, Hong K. Meta-Analysis of CHADS versus CHADS-VASc for  
914 Predicting Stroke and Thromboembolism in Atrial Fibrillation Patients Independent of  
915 Anticoagulation. *Tex Heart Inst J*. 2015;42(1):6-15.
- 916 42. LeBlanc A, Bodde AE, Branda ME, et al. Translating comparative effectiveness of  
917 depression medications into practice by comparing the depression medication choice  
918 decision aid to usual care: study protocol for a randomized controlled trial. *Trials*.  
919 2013;14:127.
- 920 43. Rudd J, Stern K, Isensee S. Low vs. high-fidelity prototyping debate. *interactions*.  
921 1996;3(1):76-85.
- 922 44. Paul A. Harris, Robert Taylor, Robert Thielke, Jonathon Payne, Nathaniel Gonzalez, Jose  
923 G. Conde, Research electronic data capture (REDCap) - A metadata-driven methodology  
924 and workflow process for providing translational research informatics support, *J Biomed*  
925 *Inform*. 2009 Apr;42(2):377-81.
- 926 45. Chew LD, Bradley KA, Boyko EJ. Brief questions to identify patients with inadequate  
927 health literacy. *Family medicine*. 2004;36(8):588-594.
- 928 46. Chew LD, Griffin JM, Partin MR, et al. Validation of screening questions for limited  
929 health literacy in a large VA outpatient population. *J Gen Intern Med*. 2008;23(5):561-  
930 566.
- 931 47. Fagerlin A, Zikmund-Fisher BJ, Ubel PA, Jankovic A, Derry HA, Smith DM. Measuring  
932 numeracy without a math test: development of the Subjective Numeracy Scale. *Med*  
933 *Decis Making*. 2007;27(5):672-680.
- 934 48. Zikmund-Fisher BJ, Smith DM, Ubel PA, Fagerlin A. Validation of the Subjective  
935 Numeracy Scale: effects of low numeracy on comprehension of risk communications and  
936 utility elicitations. *Med Decis Making*. 2007;27(5):663-671.
- 937 49. Cunny KA, Perri M, 3rd. Single-item vs multiple-item measures of health-related quality  
938 of life. *Psychological reports*. 1991;69(1):127-130.
- 939 50. Stacey D, Legare F, Col NF, et al. Decision aids for people facing health treatment or  
940 screening decisions. *The Cochrane database of systematic reviews*. 2014;1:CD001431.
- 941 51. O'Connor AM. Validation of a decisional conflict scale. *Med Decis Making*.  
942 1995;15(1):25-30.
- 943 52. CAHPS ([https://cahps.ahrq.gov/clinician\\_group](https://cahps.ahrq.gov/clinician_group))
- 944 53. Barr PJ, O'Malley AJ, Tsulukidze M, Gionfriddo MR, Montori V, Elwyn G. The  
945 psychometric properties of Observer OPTION, an observer measure of shared decision  
946 making. *Patient Educ Couns*. 2015.
- 947 54. Lawrence I-Kuei Lin. A Concordance Correlation Coefficient to Evaluate  
948 Reproducibility. *Biometrics* 45.1 (1989): 255-68.
- 949 55. Donner A, Klar N. Design and analysis of cluster randomized trials in health research.  
950 London: Arnold Publishers; 2000.
- 951
