# Supplementary material for: Cost Conversations About Anticoagulation Between Patients With Atrial Fibrillation and Their Clinicians: A Secondary Analysis of a Randomized Clinical Trial
Source: PubMed Central journal article supplement (PMC8278261; doi:10.1001/jamanetworkopen.2021.16009), 2021-07-13
Supplement: jamanetwopen-e2116009-s003.pdf [file jamanetwopen-e2116009-s003.pdf]

Supplemental Online Content: Nonauthor Collaborators

\*Indicates required information. Only first name, last name, and suffix will appear in PubMed.

| *Group Name(s): Shared Decision Making for Atrial Fibrillation (SDM4AFib) Trial Investigators |                   |                       |                  |                                          |                                          |                                                         |                                                                                            |
|-----------------------------------------------------------------------------------------------|-------------------|-----------------------|------------------|------------------------------------------|------------------------------------------|---------------------------------------------------------|--------------------------------------------------------------------------------------------|
| *First Name and Middle Initial(s)                                                             | *Last Name        | *Suffix (eg, Jr, III) | Academic Degrees | Institution                              | Location (city, state/province, country) | Role or Contribution, eg, chair, principal investigator | Group (if more than 1 Group listed in the byline) and/or Subgroup (eg, Steering Committee) |
| Alexander                                                                                     | Haffke            |                       |                  | Hennepin Health                          | Minneapolis, Minnesota                   | Study Coordinator                                       |                                                                                            |
| Amy                                                                                           | Stier             |                       |                  | Mayo Clinic                              | Rochester, MN                            |                                                         |                                                                                            |
| Anjali                                                                                        | Thota             |                       |                  | Mayo Clinic                              | Rochester, MN                            | Study Coordinator                                       |                                                                                            |
| Annie                                                                                         | LeBlanc           |                       |                  | Mayo Clinic                              | Rochester, MN                            |                                                         |                                                                                            |
| Benjamin                                                                                      | Simpson           |                       |                  | Hennepin Health                          | Minneapolis, Minnesota                   | Study Coordinator                                       |                                                                                            |
| Claudia                                                                                       | Zeballos-Palacios |                       |                  | Mayo Clinic                              | Rochester, MN                            |                                                         |                                                                                            |
| Derek                                                                                         | Vanmeter          |                       |                  | Mayo Clinic                              | Rochester, MN                            | Study Coordinator                                       |                                                                                            |
| Emma                                                                                          | Behnken           |                       |                  | Mayo Clinic                              | Rochester, MN                            | Study Coordinator                                       |                                                                                            |
| Erik                                                                                          | Hess              |                       | MD               | Division of Cardiovascular Disease, Univ | Birmingham, Alabama                      | Site Principal Investigator                             |                                                                                            |
| Henry                                                                                         | Ting              |                       |                  | Mayo Clinic                              | Rochester, MN                            |                                                         |                                                                                            |
| James                                                                                         | Hamilton          | IV                    | MD               | University of Mississippi Medical Center | Jackson, MS                              | Site Principal Investigator                             |                                                                                            |
| Joel                                                                                          | Anderson          |                       |                  | Mayo Clinic                              | Rochester, MN                            | Study Coordinator                                       |                                                                                            |
| Jonathan                                                                                      | Inselman          |                       |                  | Mayo Clinic                              | Rochester, MN                            | Statistician                                            |                                                                                            |
| Jule                                                                                          | Muegge            |                       |                  | Hennepin Health                          | Minneapolis, Minnesota                   | Study Coordinator                                       |                                                                                            |
| Kirsten                                                                                       | Fleming           |                       | BA               | Mayo Clinic                              | Rochester, MN                            | Study manager                                           |                                                                                            |
| Marc                                                                                          | Olive             |                       |                  | Mayo Clinic                              | Rochester, MN                            | Study Coordinator                                       |                                                                                            |
| Mark                                                                                          | Linzer            |                       | MD               | Hennepin Health                          | Minneapolis, Minnesota                   | Site Principal Investigator                             |                                                                                            |
| Miamoua                                                                                       | Vang              |                       |                  | Hennepin Health                          | Minneapolis, Minnesota                   | Study Coordinator                                       |                                                                                            |
| Michael                                                                                       | Ferrara           |                       |                  | Mayo Clinic                              | Rochester, MN                            |                                                         |                                                                                            |
| Mike                                                                                          | Wambua            |                       |                  | Hennepin Health                          | Minneapolis, Minnesota                   | Study Coordinator                                       |                                                                                            |
| Paige                                                                                         | Organick          |                       |                  | Mayo Clinic                              | Rochester, MN                            | Study Coordinator                                       |                                                                                            |
| Renee                                                                                         | Cabalka           |                       |                  | Mayo Clinic                              | Rochester, MN                            | Study Coordinator                                       |                                                                                            |
| Sara                                                                                          | Poplau            |                       |                  | Hennepin Health                          | Minneapolis, Minnesota                   | Study Coordinator                                       |                                                                                            |
| Takeki                                                                                        | Suzuki            |                       | MD               | University of Mississippi Medical Center | Jackson, MS                              | Site Principal Investigator                             |                                                                                            |
| Carol                                                                                         | Abullarade        |                       |                  | Park Nicollet Health Services            | St Lois Park, Minnesota                  | Study Coordinator                                       |                                                                                            |
| Lisa                                                                                          | Harvey            |                       |                  | Park Nicollet Health Services            | St Lois Park, Minnesota                  |                                                         |                                                                                            |
| Shelly                                                                                        | Keune             |                       |                  | Park Nicollet Health Services            | St Lois Park, Minnesota                  | Study Coordinator                                       |                                                                                            |
| Timothy                                                                                       | Smith             |                       |                  | Division of Cardiovascular Disease, Univ | Birmingham, Alabama                      | Study Coordinator                                       |                                                                                            |
| Shannon                                                                                       | Stephens          |                       |                  | Division of Cardiovascular Disease, Univ | Birmingham, Alabama                      | Study Coordinator                                       |                                                                                            |
| Bryan                                                                                         | Barksdale         |                       |                  | University of Mississippi Medical Center | Jackson, MS                              |                                                         |                                                                                            |
| Theresa                                                                                       | Hickey            |                       |                  | University of Mississippi Medical Center | Jackson, MS                              | Study Coordinator                                       |                                                                                            |
| Roma                                                                                          | Peters            |                       |                  | University of Mississippi Medical Center | Jackson, MS                              |                                                         |                                                                                            |
| Memrie                                                                                        | Price             |                       |                  | University of Mississippi Medical Center | Jackson, MS                              | Study Coordinator                                       |                                                                                            |
| Connie                                                                                        | Watson            |                       |                  | University of Mississippi Medical Center | Jackson, MS                              | Study Coordinator                                       |                                                                                            |
| Douglas                                                                                       | Wolfe             |                       |                  | University of Mississippi Medical Center | Jackson, MS                              |                                                         |                                                                                            |
| Gordon                                                                                        | Guyatt            |                       |                  |                                          |                                          | Data Safety and Monitoring Board Chair                  |                                                                                            |
| Brian                                                                                         | Haynes            |                       |                  |                                          |                                          | Data Safety and Monitoring Board                        |                                                                                            |
| George                                                                                        | Tomlinson         |                       |                  |                                          |                                          | Data Safety and Monitoring Board                        |                                                                                            |
| Paul                                                                                          | Daniels           |                       |                  |                                          |                                          | Expert advisory panel                                   |                                                                                            |
| Bernard                                                                                       | Gersh             |                       |                  | Mayo Clinic                              | Rochester, MN                            | Expert advisory panel                                   |                                                                                            |

Supplemental Online Content: Nonauthor Collaborators

\*Indicates required information. Only first name, last name, and suffix will appear in PubMed.

| *First Name and Middle Initial(s) | *Last Name | *Suffix (eg, Jr, III) | Academic Degrees | Institution | Location (city, state/province, country) | Role or Contribution, eg, chair, principal investigator | Group (if more than 1 Group listed in the byline) and/or Subgroup (eg, Steering Committee) |
|-----------------------------------|------------|-----------------------|------------------|-------------|------------------------------------------|---------------------------------------------------------|--------------------------------------------------------------------------------------------|
| Thomas                            | Jaeger     |                       |                  | Mayo Clinic | Rochester, MN                            | Expert advisory panel                                   |                                                                                            |
| Robert                            | McBane     |                       |                  |             |                                          | Expert advisory panel                                   |                                                                                            |
|                                   |            |                       |                  |             |                                          | Expert advisory panel                                   |                                                                                            |
|                                   |            |                       |                  |             |                                          | Expert advisory panel                                   |                                                                                            |
